# Supplementary material
Source: PubMed Central journal article supplement (PMC5937183)
Supplement: 157FileS1.pdf [file 157FileS1.pdf]

1 **Proteasome activity is influenced by the HECT\_2 protein Ipa1 in budding yeast**

2

3 Anne P Lutz, Sarah Schladebeck, Christian Renicke, Roberta Spadaccini, Hans-Ulrich Mösch,  
4 Christof Taxis

5

6 **Supplemental Figures**

7 **Supplemental Figure S1**

8 The HECT\_2-family signature

9 **Supplemental Figure S2**

10 Complementation assay with *IPA1* alleles

11 **Supplemental Figure S3**

12 Sequence alignment of Ipa1 (residues 88-214) with zinc-binding domains

13 **Supplemental Figure S4**

14 Ipa1 interacts with ubiquitin-conjugating enzymes

15 **Supplemental Figure S5**

16 Peroxisome number and protein import into peroxisomes is not affected in Ipa1-depleted cells

17 **Supplemental Figure S6**

18 Transcriptome analysis of Ipa1-psd cells

19 **Supplemental Figure S7**

20 The abundance of the Cdc48-Npl4-Ufd1 complex is increased in Ipa1-depleted cells

21 **Supplemental Figure S8**

22 Localization of proteasomal subunits Pre2 and Pre10, cell size analysis, and cell cycle stage  
23 distribution of Ipa1-psd cells.

24 **Supplemental Figure S9**

25 Alignment of the C-termini of selected HECT\_2 domain proteins

26

27 **Table legends**

28 **Supplemental Table S1**

29 Pfam protein name and organism identifier are given for each node of the network shown in  
30 Figure 1b.

31 **Supplemental Table S2**

32 Microarray data for Ipa1-psd strain compared to control strain ESM356-1, both exposed to blue-  
33 light for 5 hours.

34 **Supplemental Table S3**

35 Microarray data for Ipa1-psd strain compared to control strain ESM356-1, both grown in darkness  
36 before the experiment.

- 37 **Supplemental Table S4**
- 38 Microarray data for ESM356-1 strain exposed to blue-light compared to strain ESM356-1 grown in  
39 darkness.
- 40 **Supplemental Table S5**
- 41 List of genes upregulated in Ipa1-psd cells compared to ESM356-1.
- 42 **Supplemental Table S6**
- 43 List of genes downregulated in Ipa1-psd cells compared to ESM356-1.
- 44 **Supplemental Table S7**
- 45 List of GO terms enriched in the upregulated gene list.
- 46 **Supplemental Table S8**
- 47 List of GO terms enriched in the downregulated gene list.
- 48 **Supplemental Table S9**
- 49 List of yeast strains.
- 50 **Supplemental Table S10**
- 51 List of plasmids.
- 52 **Supplemental Table S11**
- 53 List of oligos used for the quantitative real-time PCR analysis.

**A**

```

1  MVQYVVEWLP RIQSISVVVE GWKQVEIKNL KDTLMSISGD EEQVEDILLP  50
    |
    E
51  VEVEEKVDAS YKFKNRGKDL EWMTKLRSKS SKIYDSSIMS LPDGRWTKEE 100

101  LRSDFSIE CLNCKQKIIS KDNCQVLNDM FLM PSN EFW FYW CHP 150
    | | | | | | | | | |
    C C FLM PSN EFW FYW CHP
151  EDKSSYTRFE TLKPSKNEIL IGSSYFQGTP ATFENVATTK ENDNVLCIKC 200
    | | | | | | | | | |
    HRP TAG YHF QSC FC
201  SAVLGQVTAG SLYKLHKWKL QLIRSGNTYK FPPECEDITIS LINVVKANSC 250
    |
    G
251  RYVLVKCKTE SLLVWIFSDV IGVTLTGNKS FKRAMKLLYT NSVTTINRCL 300
    | | | | | | | | | |
    FHR YYF HW RK YF
301  NRQVVEELDF QETSFNAFYS ALQHTNALLP SSMKKIGEWI ISYTSLI  347
    |
    AP

```

**B**

| domain architecture | number of members |
|---------------------|-------------------|
| HECT_2              | 371               |
| HECT_2 x 2          | 11                |
| HECT_2 + other      | 11                |

source:

55 [http://pfam.xfam.org/family/HECT\\_2#tabview=tab1](http://pfam.xfam.org/family/HECT_2#tabview=tab1)

56 **Supplemental Figure S1**57 **The HECT\_2-family signature**

58 (A) The HECT\_2-family signature compared to Yjr141w/lpa1 sequence. The family signature  
59 (source <http://pfam.xfam.org/family/pf09814#tabview=tab4>) is placed above the corresponding  
60 residue (indicated by a line) in Yjr141w/lpa1. Invariant residues are shown in bold letters.

61 (B) Most family members currently listed in the Pfam database contain only the HECT\_2 domain.

62

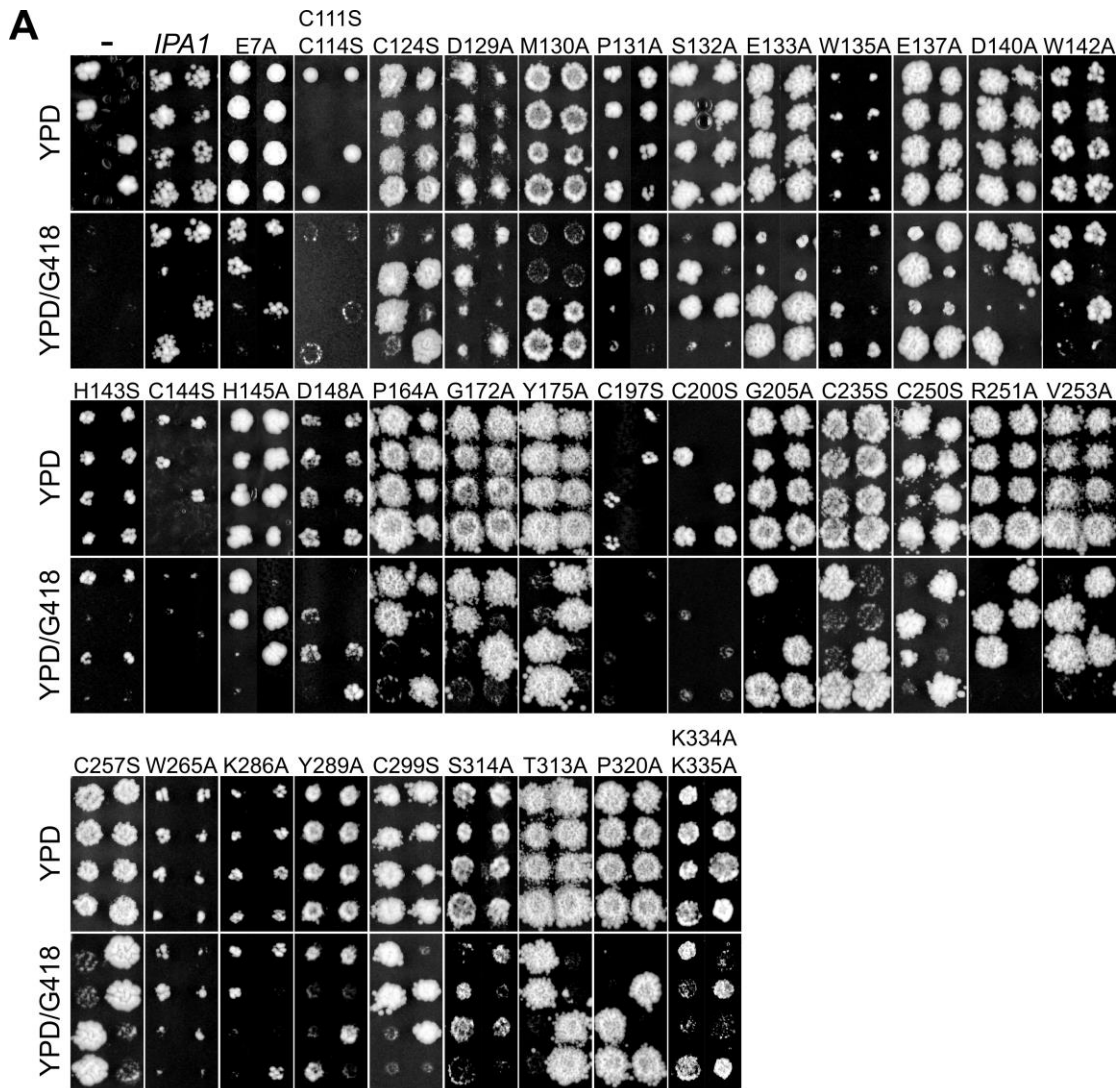

**B**

```

1  MVQYVVEEWLP RIQISISVVVE GWKQVEIKNL KDTLMSISGD EEQVEDILLP 50

51  VEVEEKVDAS YKFKNRGKDL EWMTKLRSKS SKIYDSSIMS LPDGRWTKEE 100

101 LRSDFSIE CCLNCCKQKIIS KDNCQVLNDM FLMPSNEFWFEELMD YWHCHKPKDVK 150

151 EDKSSYTRFE TLKPSKNEIL IGSSYFQGTP ATFENVATTK ENDNVLCIKC 200

201 SAVLGQVDTAG SLYKLHKWKL QLIRSGNTYK FPPECDDITIS LINVVKANSC 250

251 FHRRYVLVKCCKTE HWSLLVWWIFSVD IGVTLTGNKS RKFKRAMKLLYYT NSVTTINRCCL 300

301 NRQVVEELDF QETSSFNAFYS ALQHTNALLP APSSMKKKIGEWT ISYTSLI 347

```

63 Supplemental Figure S2

64

65 **Complementation assay with *IPA1* alleles**

66 (A) Plasmid-encoded *IPA1* alleles (as indicated) were transformed into diploid yeast cells with a  
67 heterozygous *IPA1* deletion, sporulated and subjected to tetrad analysis. Upper row: growth on  
68 YPD medium, lower row: growth on YPD + 200 mg/l Geneticin, which selects for cells carrying the  
69 *IPA1* deletion.

70 (B) Mutational approach mapped to the sequence of *Ipa1*. The family signature of the HECT\_2  
71 domain is indicated, invariant residues are shown in bold. Residues shown underlined and in red  
72 were essential for viability, residues dotted and in green were not (black = not tested).

73



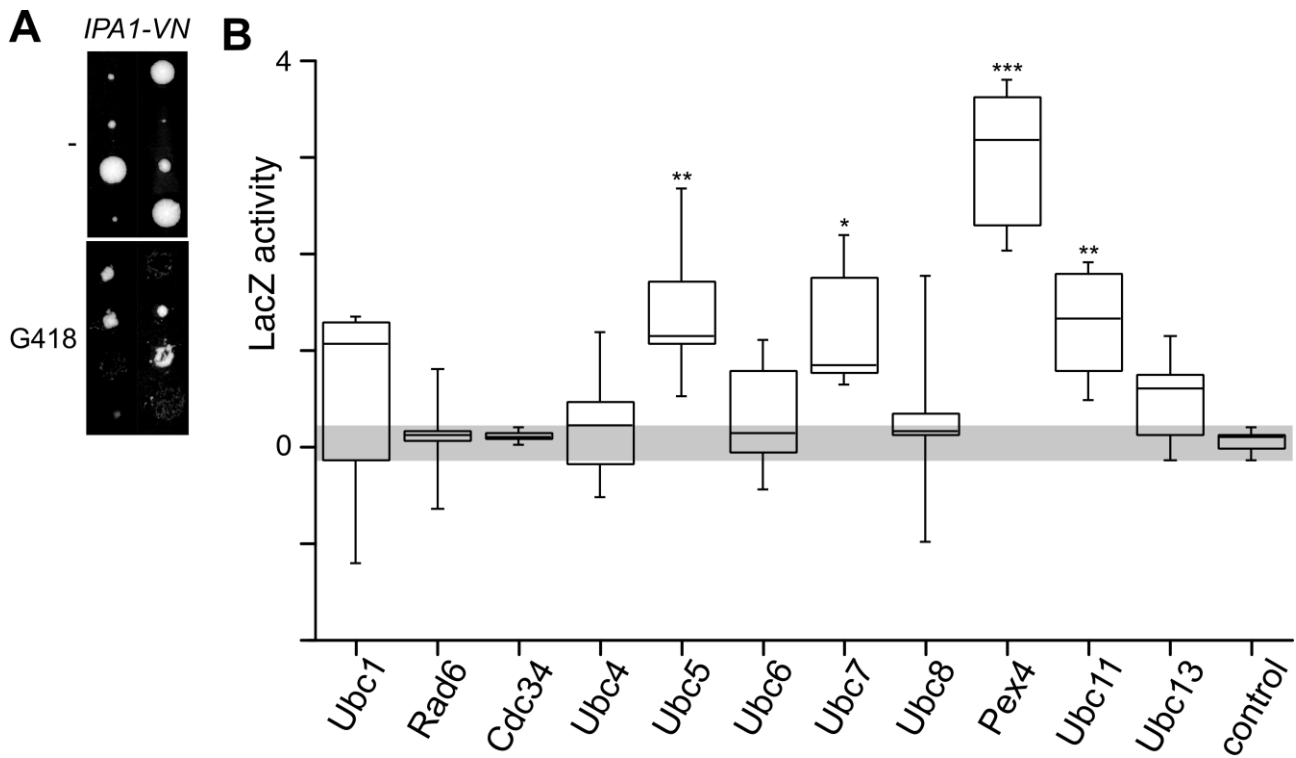

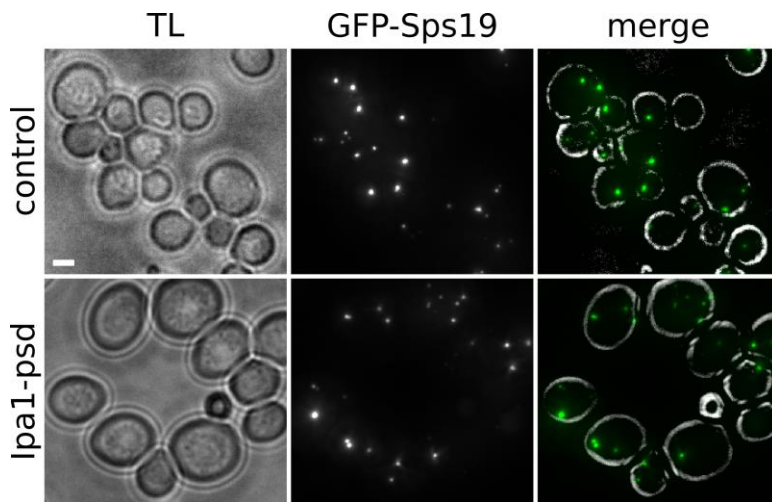

101

102 **Supplemental Figure S5**

103 **Peroxisome number and protein import into peroxisomes is not affected in lpa1-depleted**  
 104 **cells**

105 The peroxisomal 2,4-dienoyl-CoA reductase Sps19 was tagged with GFP. Cells in logarithmic  
 106 growth-phase exposed to blue-light for five hours were subjected to fluorescence microscopy. TL  
 107 images, maximum projections of z-stacks for fluorescence channel, and TL/YFP overlays are  
 108 shown (bar size 2  $\mu$ m).

109



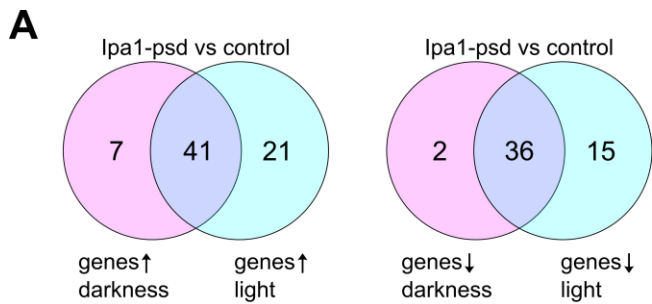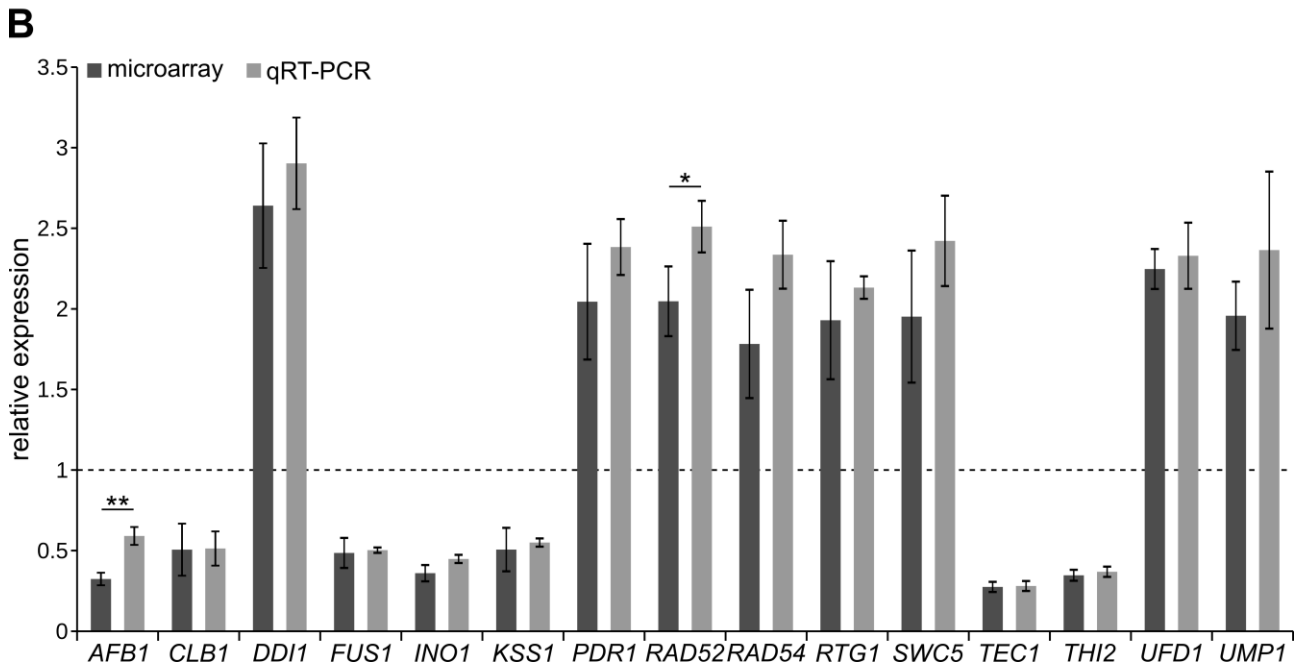

110

111 **Supplemental Figure S6**

112 **Transcriptome analysis of lpa1-psd cells**

113 (A) Venn diagrams showing the overlap between differentially regulated genes in lpa1-psd cells  
 114 exposed to blue-light or kept in darkness compared with control cells exposed to the same  
 115 conditions. Left side: genes with higher expression (>2), right side: genes with lower expression  
 116 (<0.5).

117 (B) Comparison of relative expression changes found in the microarray experiments with data  
 118 obtained by real-time qRT-PCR for selected genes. Messenger RNA was obtained from  
 119 logarithmically growing lpa1-psd cells and control cells exposed to blue-light (n=3; error bar =  
 120 standard deviation; statistical significance of differences was tested by a two-sided student's t-test,  
 121 \*\*: P<0.01; \*: P<0.05).

122

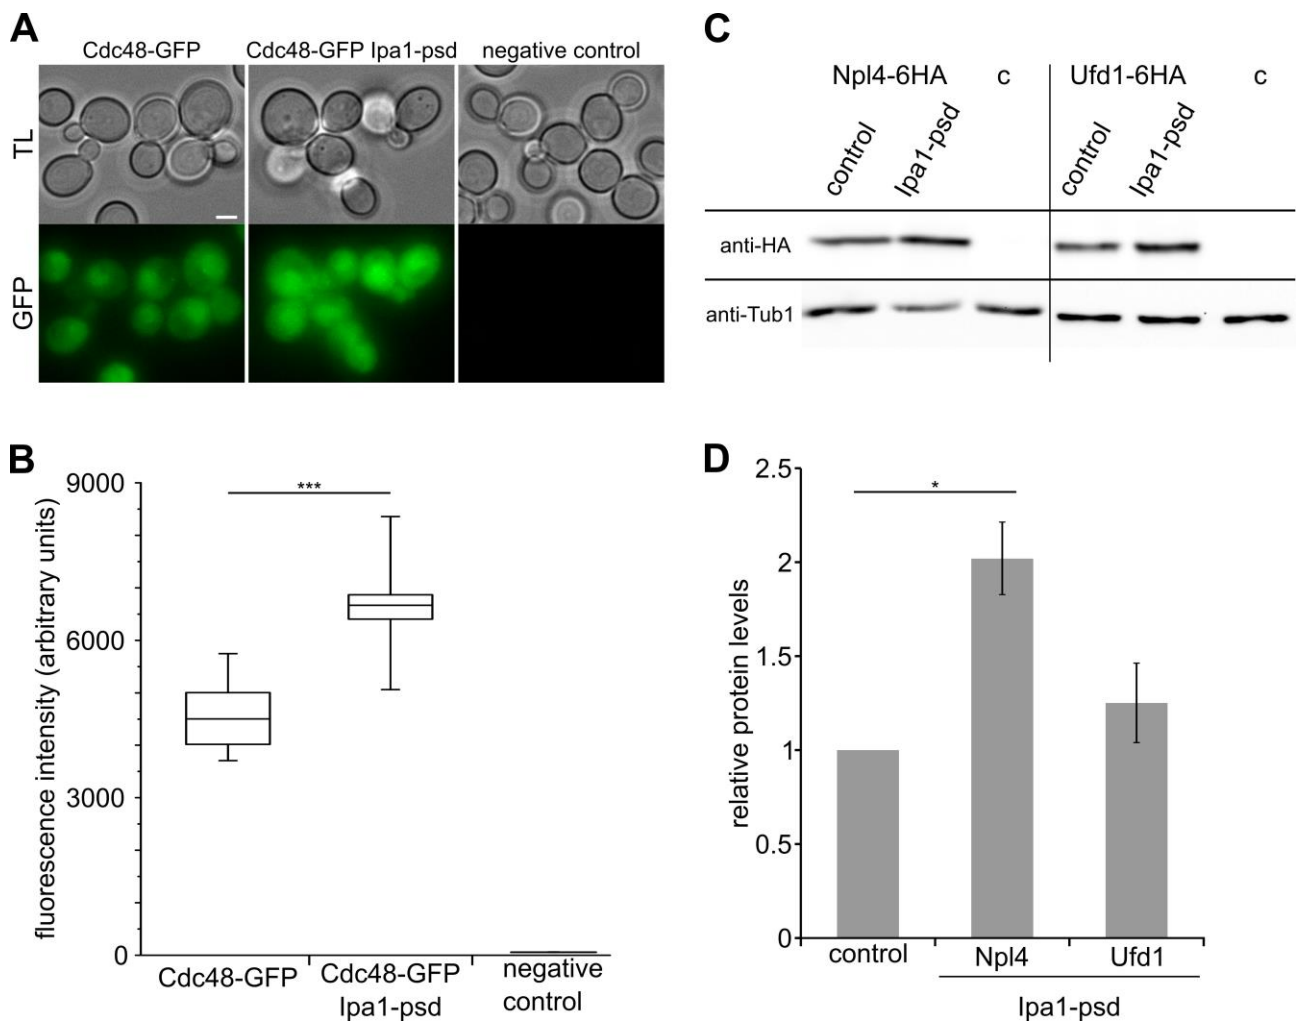

123

124 **Supplemental Figure S7**

125 **The abundance of the Cdc48-Npl4-Ufd1 complex is increased in Ipa1-depleted cells**

126 (A) Abundance of Cdc48-GFP in control cells compared to Ipa1-psd cells. Cells in logarithmic  
 127 growth-phase were subjected to fluorescence microscopy. TL images and maximum projections of  
 128 z-stacks for fluorescence channel are shown (bar size 2  $\mu$ m).

129 (B) Quantification of Cdc48-GFP levels. Example images are shown in A. An ImageJ macro was  
 130 used for segmentation and fluorescence intensity measurement in projected z-stacks. For each  
 131 strain 1000 cells were analyzed. Whiskers comprise full range of measurements (statistical  
 132 significance of differences was tested by a two-sided student's t-test, \*\*\*:  $p \leq 0.001$ ).

133 (C) Abundance of Npl4-6HA and Ufd1-6HA in control cells compared to Ipa1-depleted cells. Whole  
 134 cell extracts were prepared from cells growing logarithmically in liquid cultures exposed to blue-  
 135 light. Blots were probed with anti-HA and anti-Tub1 (loading control) antibodies.

136 (D) Quantification of Npl4-6HA and Ufd1-6HA abundance in Ipa1-psd cells exposed to blue-light.  
 137 Exemplary blot shown in C. Graph shows the mean of at least four independent measurements,  
 138 Npl4-6HA and Ufd1-6HA levels were normalized to Tub1 signal (error bar = standard error of the  
 139 mean; statistical significance of differences was tested by a two-sided student's t-test, \*:  $p \leq 0.05$ ).

140

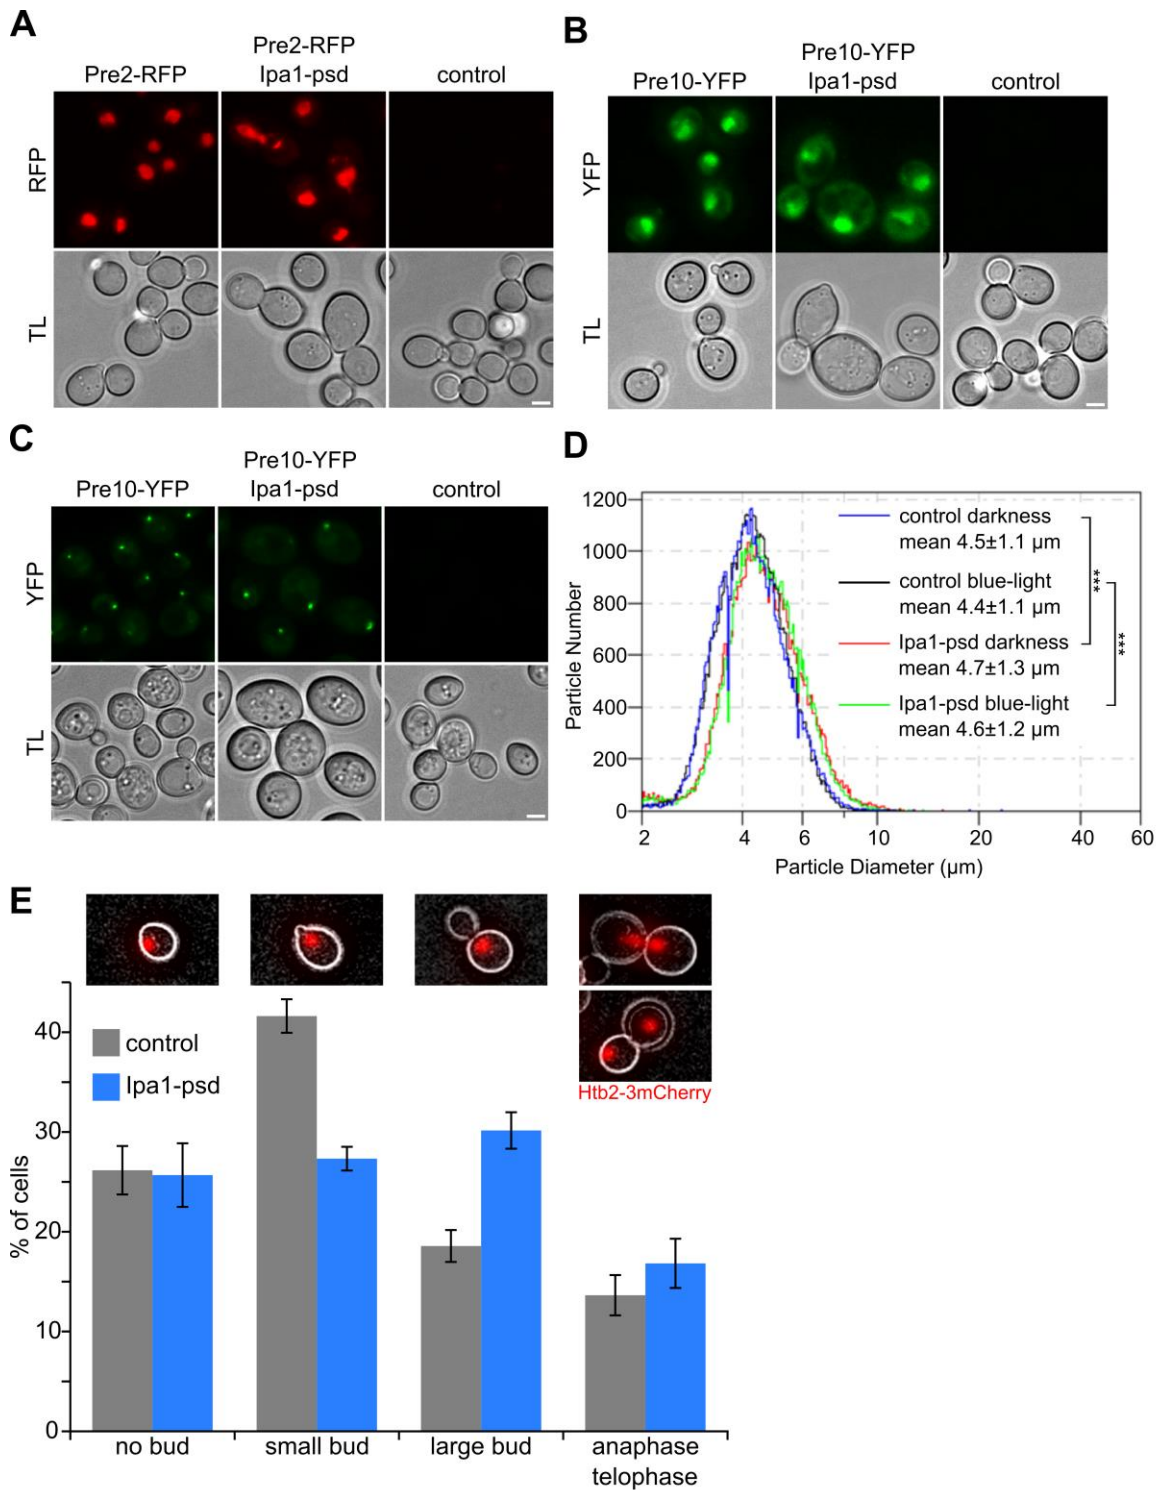

141

142 **Supplemental Figure S8**

143 **Localization of proteasomal subunits Pre2 and Pre10, cell-size analysis, and cell-cycle stage**  
 144 **distribution of lpa1-psd cells**

145 (A) Pre2-RFP localization was analyzed in control cells and cells depleted for lpa1-psd in the  
 146 logarithmic growth phase. Cells were exposed for 5 hours to blue-light before the start of the  
 147 experiment. Maximum projections of deconvolved z-stacks are shown for fluorescence channels  
 148 together with TL images (bar size 2 μm).

149 **(B)** As in A. Analyzing localization of Pre10-YFP.

150 **(C)** Pre10-YFP localization was analyzed in control and Ipa1-psd cells after prolonged starvation to  
151 induce proteasomal foci formation. Cells were kept in darkness during growth and starvation  
152 phase. Maximum projections of deconvolved z-stacks are shown for fluorescence channels (bar  
153 size 2  $\mu\text{m}$ ).

154 **(D)** Analysis of cell size distribution in a population of yeast cells. Cell diameter was determined  
155 with a Coulter Counter, 50 000 cells were analyzed for each curve (error: standard deviation;  
156 statistical significance of differences was tested by a two-sided student's t-test, \*\*\*:  $p \leq 0.001$ ).

157 **(E)** Cell cycle analysis of control (Htb2-3mCherry) and Ipa1-depleted cells (Ipa1-psd Htb2-  
158 3mCherry). Cells were exposed to blue-light ( $465 \text{ nm } 30 \mu\text{mol m}^{-2} \text{ s}^{-1}$ ) for 5 hours. Cell cycle stage  
159 was determined considering cell morphology and Htb2-3mCherry signals. Example images for  
160 each stage are shown at the top of the bar graph (bar size 2  $\mu\text{m}$ ). The images are an overlay of  
161 transmitted light images with maximum projections of the fluorescence image z-stacks.

162

```

* . * . : : * . : * ** * : : . . : : . . : :
163 P_troglodytes_UBE3D 353 LP-SATCL-ELLILLSKSNANLPSSLRH MNSFQVAFLKM-
P_abelii_UBE3D 353 LP-SATCL-ELLILLSKSNANLPSSLRH MNSFQVAFLKI-
M_mulatta_UBE3D 353 LP-SATCL-ELLILLSRSNANLPSSLRH MNSFQVAFLKM-
H_sapiens_UBE3D 353 LP-SATCL-ELLILLSKSNANLPSSL R R VNSFQVAFLKM-
M_musculus_UBE3D 332 LP-SATCL-ELLILLSRNNASLPLSLRQ MNSFQVAFLKM-
164 S_cerevisiae_IPA1 308 LDFQETSFNAFYSALQHTNALLPSSM K K IGEWTISYTSLI

```

164 **Supplemental Figure S9**

165 **Alignment of the C-termini of selected HECT\_2 domain proteins**

166 The sequences of the C-termini of the HECT\_2 domain proteins *Homo sapiens* (*H\_sapiens*)  
167 UBE3D, *Macaca mulatta* (*M\_mulatta*) UBE3D, *Mus musculus* (*M\_musculus*), *Pongo abelii*  
168 (*P\_abelii*) UBE3D, *Pan troglodytes* (*P\_troglodytes*) UBE3D, and *Saccharomyces cerevisiae*  
169 (*S\_cerevisiae*) Ipa1 were aligned with ClustalX. The conservation grade of a residue is shown by  
170 asterisk, double point and point to indicate strict conservation, higher, and lower similarity,  
171 respectively. The residues corresponding to *H. sapiens* V379 are highlighted in magenta, the  
172 adjacent arginines in UBE3D and the lysines in Ipa1 are shown in bold.
